# Supplementary material for: Longitudinal Prediction of Infant MR Images With Multi-Contrast Perceptual Adversarial Learning
Source: Front Neurosci. 2021 Sep 9;15:653213. doi: 10.3389/fnins.2021.653213 (PMC8458966; doi:10.3389/fnins.2021.653213)
Supplement: Supplementary file 4 [file Data_Sheet_4.ZIP]

Archive with 18 entries (17 files):
- 12monthFrom6MonthT1/
- __MACOSX/._12monthFrom6MonthT1
- 12monthFrom6MonthT1/12monthFrom6MonthT1_PGAN.png
- __MACOSX/12monthFrom6MonthT1/._12monthFrom6MonthT1_PGAN.png
- 12monthFrom6MonthT1/12monthFrom6MonthT1_CycleGAN.png
- __MACOSX/12monthFrom6MonthT1/._12monthFrom6MonthT1_CycleGAN.png
- 12monthFrom6MonthT1/12monthFrom6MonthT1_Unet.png
- __MACOSX/12monthFrom6MonthT1/._12monthFrom6MonthT1_Unet.png
- 12monthFrom6MonthT1/12monthFrom6MonthT1_GroundTruth.png
- __MACOSX/12monthFrom6MonthT1/._12monthFrom6MonthT1_GroundTruth.png
- 12monthFrom6MonthT1/12monthFrom6MonthT1_GAN.png
- __MACOSX/12monthFrom6MonthT1/._12monthFrom6MonthT1_GAN.png
- 12monthFrom6MonthT1/12monthFrom6MonthT1_GAN_L1.png
- __MACOSX/12monthFrom6MonthT1/._12monthFrom6MonthT1_GAN_L1.png
- 12monthFrom6MonthT1/12monthFrom6MonthT1_Unet_Lp.png
- __MACOSX/12monthFrom6MonthT1/._12monthFrom6MonthT1_Unet_Lp.png
- 12monthFrom6MonthT1/12monthFrom6MonthT1_MPGAN.png
- __MACOSX/12monthFrom6MonthT1/._12monthFrom6MonthT1_MPGAN.png
